# Supplementary material
Source: PubMed Central journal article supplement (PMC3993279)
Supplement: AEM.00006-14_zam999105303so1.pdf [file AEM.00006-14_zam999105303so1.pdf]

**TABLE S1. Oligonucleotide primers used in this study.**

| Primer              | Oligonucleotide sequence *                          |
|---------------------|-----------------------------------------------------|
| plsΔC740b-F         | 5'-CGCGGATCCGGGAACACCACCGGTTAGTTCAGAAAATTCAACAAC-3' |
| plsΔC740b-R         | 5'-GGCCGCTCGAGTCAGATTTCCAGGACTTGGTAACGTTAACAAGAC-3' |
| plsC740b-F          | 5'-GGGAATTCCATATGCTTAAGGCTATAAACGGCACCCTC-3'        |
| plsC740b-R          | 5'-GGCCGCTCGAGTCATTACTCTTACCCTCTAATTCTTCTATGGC-3'   |
| plsD55A-F           | 5'-GAATGGAAGGCTTTTACAGACGAGGGATTCGTGGATAC-3'        |
| plsD55A-R           | 5'-GTCTGTAAAAACCTTCCATTCTATAATTTTCTGCGTCC-3'        |
| plsD58A-F           | 5'-GATTTTACAGCCGAGGGATTCGTGGATACATCATTACAGC-3'      |
| plsD58A-R           | 5'-GAATCCCTCGGCTGTGAAAATCCTTCCATTCTATAATTTTC-3'     |
| plsE59A-F           | 5'-ACAGACCGGGGATTCGTGGATACATCATTACAGCTTTAG-3'       |
| plsE59A-R           | 5'-ATCCACGAATCCCCTGTCTGTAAAATCCTTCCATTTC-3'         |
| plsD55A/D58A-F      | 5'-GAAAATTATAGAATGGAAGGCAATTTACAGCAGAGGGATTCGTGG-3' |
| plsD55A/D58A-R      | 5'-CCACGAATCCCTCTGCTGTAAAATGCTTCCATTCTATAATTTTC-3'  |
| plsD55A/E59A-F      | 5'-AAGGCTTTTACAGACCGGGGATTCGTGGATACATCATTTC-3'      |
| plsD55A/E59A-R      | 5'-TCCCCTGTCTGTAAAATGCTTCCATTCTATAATTTTCC-3'        |
| plsD58A/E59A-F      | 5'-GATTTTACAGCCCGGGGATTCGTGGATACATCATTACAGC-3'      |
| plsD58A/E59A-R      | 5'-GAATCCCGCGCTGTGAAAATCCTTCCATTCTATAATTTTC-3'      |
| plsD55A/D58A/E59A-F | 5'-ACAGCCGGGGATTCGTGGATACATCATTACAGCTTTAG-3'        |
| plsD55A/D58A/E59A-R | 5'-ATCCACGAATCCCCTGCTGTAAAATGCTTCCATTTC-3'          |
| plsD55N/D58N-F      | 5'-GAAAATTATAGAATGGAAGAAATTTTACAACGAGGGATTCGTGG-3'  |
| plsD55N/D58N-R      | 5'-CCACGAATCCCTCGTTGTGAAAATCTTCCATTCTATAATTTTC-3'   |
| plsD55N/D58N/E59Q-F | 5'-ACAACAGGGATTCGTGGATACATCATTACAGCTTTAG-3'         |
| plsD55N/D58N/E59Q-R | 5'-ATCCACGAATCCCTGTTGTGAAAATCTTCCATTTC-3'           |
| plsR276A-F          | 5'-ATGGCAATAAGAGTTCCTTAGGAGTGATGGACGGGGTAGC-3'      |
| plsR276A-R          | 5'-CCTAAGAAGTCTATTGCCATTATTTGGGCACCTGGAGC-3'        |
| plsD818A-F          | 5'-AATTCAGCTCTAGACTTGTACCTTTATGACAGTAAAG-3'         |
| plsD818A-R          | 5'-GTACAAGTCTAGAGCTGAATTCGGAACACTTGGGTTG-3'         |
| plsD820A-F          | 5'-AATTCAGATCTAGCTTGTACCTTTATGACAGTAAAG-3'          |
| plsD820A-R          | 5'-GTACAAGCTAGATCTGAATTCGGAACACTTGGGTTG-3'          |
| plsE842A-F          | 5'-GCAGAAGAAGCAGTTGTAGTTGAGTATCCTAAGCCTG-3'         |
| plsE842A-R          | 5'-TACAACCTCTTCTTCTGCTGTTGGGTTCCATCTAAG-3'          |
| plsD818A/D820A-F    | 5'-AATTCAGCACTAGCAATTGTACCTTTATGACAGTAAAG-3'        |
| plsD818A/D820A-R    | 5'-GTACAATGCTAGTCTGAATTCGGAACACTTGGGTTGCC-3'        |
| plsD818N-F          | 5'-AATTCACAATCTAGACTTGTACCTTTATGACAGTAAAG-3'        |
| plsD818N-R          | 5'-GTACAAGTCTAGATTTGAATTCGGAACACTTGGGTTGCC-3'       |
| plsD820N-F          | 5'-AATTCAGATCTAACTTGTACCTTTATGACAGTAAAG-3'          |
| plsD820N-R          | 5'-GTACAAGTTTAGATCTGAATTCGGAACACTTGGGTTGCC-3'       |
| plsE842Q-F          | 5'-GCAGAAGAAAGAGTTGTAGTTGAGTATCCTAAGCCTG-3'         |
| plsE842Q-R          | 5'-TACAACCTGTTCTTCTGCTGTTGGGTTCCATCTAAG-3'          |
| plsD818N/D820N-F    | 5'-AATTCACAATCTAACTTGTACCTTTATGACAGTAAAG-3'         |
| plsD818N/D820N-R    | 5'-GTACAAGTTTAGATTTGAATTCGGAACACTTGGGTTGCC-3'       |

\* Underlined sequences indicate the restriction enzyme sites used in this study. Boxes indicate the

mutated nucleotides.

**TABLE S2. Primer pairs, template and restriction enzyme sites used in the construction of expression plasmids.**

| Expression plasmid                   | Primer pair                                 | Template                     | Restriction enzyme site     |
|--------------------------------------|---------------------------------------------|------------------------------|-----------------------------|
| pET26b- <i>pls</i> ΔC740b            | plsΔC740b-F+plsΔC740b-R                     | pET26b- <i>pls</i>           | <i>Bam</i> HI- <i>Xho</i> I |
| pET26b- <i>pls</i> C740b             | plsC740b-F+plsC740b-R                       | pET26b- <i>pls</i>           | <i>Nde</i> I- <i>Xho</i> I  |
| pET26b- <i>pls</i> D55A              | plsD55A-F+plsD55A-R                         | pET26b- <i>pls</i>           | -                           |
| pET26b- <i>pls</i> D58A              | plsD58A-F+ plsD58A-R                        | pET26b- <i>pls</i>           | -                           |
| pET26b- <i>pls</i> E59A              | plsE59A-F+plsE59A-R                         | pET26b- <i>pls</i>           | -                           |
| pET26b- <i>pls</i> D55A/D58A         | plsD55A/D58A-F+<br>plsD55A/D58A-R           | pET26b- <i>pls</i>           | -                           |
| pET26b- <i>pls</i> D55A/E59A         | plsD55A/E59A-F+<br>plsD55A/E59A-R           | pET26b- <i>pls</i>           | -                           |
| pET26b- <i>pls</i> D58A/E59A         | plsD58A/E59A-F+<br>plsD58A/E59A-R           | pET26b- <i>pls</i>           | -                           |
| pET26b- <i>pls</i> D55A/D58A/E59A    | plsD55A/D58A/E59A-F+<br>plsD55A/D58A/E59A-R | pET26b- <i>pls</i> D55A      | -                           |
| pET26b- <i>pls</i> D55N/D58N         | plsD55N/D58N-F+<br>plsD55N/D58N-R           | pET26b- <i>pls</i>           | -                           |
| pET26b- <i>pls</i> D55N/D58N/E59Q    | plsD55N/D58N/E59Q-F+<br>plsD55N/D58N/E59Q-R | pET26b- <i>pls</i> D55N/D58N | -                           |
| pET26b- <i>pls</i> R276A             | plsR276A-F+plsR276A-R                       | pET26b- <i>pls</i>           | -                           |
| pET26b- <i>pls</i> D818A             | plsD818A-F+plsD818A-R                       | pET26b- <i>pls</i>           | -                           |
| pET26b- <i>pls</i> D820A             | plsD820A-F+plsD820A-R                       | pET26b- <i>pls</i>           | -                           |
| pET26b- <i>pls</i> E842A             | plsE842A-F+plsE842A-R                       | pET26b- <i>pls</i>           | -                           |
| pET26b- <i>pls</i> D818A/D820A       | plsD818A/D820A-F+<br>plsD818A/D820A-R       | pET26b- <i>pls</i>           | -                           |
| pET26b- <i>pls</i> D818A/D820A/E842A | PlsD818A/D820A-F+<br>plsD818A/D820A-R       | pET26b- <i>pls</i> E842A     | -                           |
| pET26b- <i>pls</i> D818N             | plsD818N-F+plsD818N-R                       | pET26b- <i>pls</i>           | -                           |
| pET26b- <i>pls</i> D820N             | plsD820N-F+plsD820N-R                       | pET26b- <i>pls</i>           | -                           |
| pET26b- <i>pls</i> E842Q             | plsE842Q-F+plsE842Q-R                       | pET26b- <i>pls</i>           | -                           |
| pET26b- <i>pls</i> D818N/D820N       | plsD818N/D820N-F+<br>plsD818N/D820N-R       | pET26b- <i>pls</i>           | -                           |
| pET26b- <i>pls</i> D818N/D820N/E842Q | plsD818N/D820N-F+<br>plsD818N/D820N-R       | pET26b- <i>pls</i> E842Q     | -                           |
